# Supplementary material
Source: publisher figshare collection journal article supplement (https://aacr.figshare.com/ndownloader/files/39928653)
Supplement: Supplementary file 1 [file 39928653]

### Supplementary Table S9. Gene Methylation Detection, Sensitivity, Specificity Using Detectable vs. Non-detectable cutoff in blacks

|  | **Cancer (n=24)** | | **Control (n=12)** | | | |  | |  |  |  |
| --- | --- | --- | --- | --- | --- | --- | --- | --- | --- | --- | --- |
| **Plasma** | **n** | **Sensitivity** | | | **n** | **Specificity** | | **PPV** | **NPV** | **AUC** | **95% CI** |
| CDO1 | 19 | 79% | | | 7 | 42% | | 73% | 50% | 0.70 | 0.50-0.90 |
| TAC1 | 21 | 88% | | | 5 | 58% | | 81% | 70% | 0.73 | 0.51-0.95 |
| HOXA7 | 18 | 75% | | | 4 | 67% | | 82% | 57% | 0.75 | 0.55-0.94 |
| HOXA9 | 13 | 54% | | | 4 | 67% | | 76% | 42% | 0.63 | 0.42-0.83 |
| SOX17 | 20 | 83% | | | 3 | 75% | | 87% | 69% | 0.84 | 0.69-0.99 |
| ZFP42 | 22 | 92% | | | 6 | 50% | | 79% | 75% | 0.67 | 0.46-0.89 |
| All (at least 3 positive) | 23 | 96% | | | 5 | 58% | | 82% | 88% | 0.68 | 0.48-0.89 |
|  |  |  | | |  |  | |  |  |  |  |
|  | **Cancer (n=23)** | | **Control (n=14)** | | | |  | |  |  |  |
| **Urine** | **n** | **Sensitivity** | | | **n** | **Specificity** | | **PPV** | **NPV** | **AUC** | **95% CI** |
| CDO1 | 18 | 78% | | | 7 | 50% | | 72% | 58% | 0.69 | 0.52-0.87 |
| TAC1 | 13 | 57% | | | 6 | 57% | | 68% | 44% | 0.58 | 0.38-0.78 |
| HOXA7 | 12 | 52% | | | 7 | 50% | | 63% | 39% | 0.54 | 0.35-0.74 |
| HOXA9 | 11 | 48% | | | 4 | 71% | | 73% | 45% | 0.61 | 0.43-0.80 |
| SOX17 | 20 | 87% | | | 5 | 64% | | 80% | 75% | 0.80 | 0.63-0.96 |
| ZFP42 | 21 | 91% | | | 9 | 36% | | 70% | 71% | 0.69 | 0.50-0.87 |
| All (at least 3 positive) | 21 | 91% | | | 9 | 36% | | 70% | 71% | 0.72 | 0.55-0.90 |
|  |  |  | | |  |  | |  |  |  |  |
|  | **Cancer (n=23)** | | | **Control (n=12)** | | |  | |  |  |  |
| **Plasma and Urine** | **n** | **Sensitivity** | | | **n** | **Specificity** | | **PPV** | **NPV** | **AUC** | **95% CI** |
| CDO1 | 16 | 70% | | | 3 | 77% | | 84% | 59% | 0.72 | 0.54-0.90 |
| TAC1 | 12 | 50% | | | 2 | 85% | | 85% | 48% | 0.60 | 0.37-0.82 |
| HOXA7 | 10 | 43% | | | 4 | 71% | | 71% | 43% | 0.70 | 0.51-0.90 |
| HOXA9 | 5 | 21% | | | 1 | 93% | | 83% | 41% | 0.68 | 0.50-0.87 |
| SOX17 | 18 | 78% | | | 1 | 92% | | 95% | 71% | 0.79 | 0.60-0.97 |
| ZFP42 | 19 | 83% | | | 6 | 50% | | 76% | 60% | 0.67 | 0.46-0.88 |
| All (at least 3 positive) | 19 | 83% | | | 2 | 83% | | 90% | 71% | 0.76 | 0.57-0.95 |

*Abbreviations*: Area under the curve: AUC; positive predictive value: PPV; negative predictive value: NPV.
